# Supplementary material
Source: PubMed Central journal article supplement (PMC2841493)
Supplement: 00147.2009_1.pdf [file 00147.2009_1.pdf]

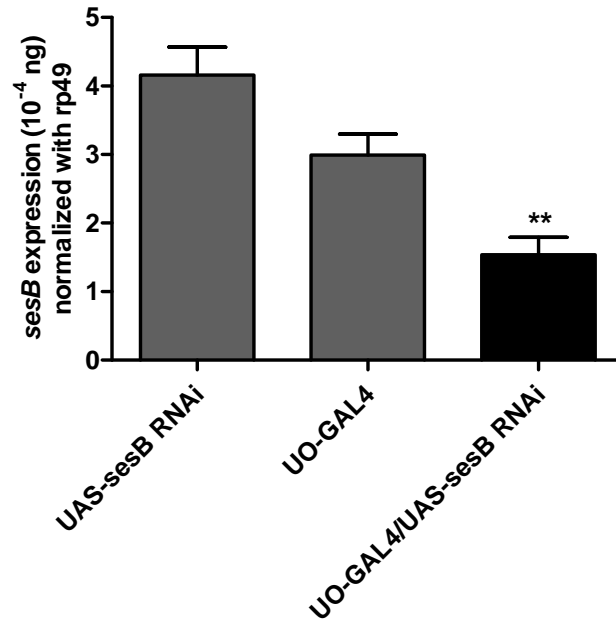

1

2 **Supplementary Fig. 1.** Expression level of *sesB* was determined by Q-RT-PCR in tubules from the  
 3 UO-GAL4 and UAS-*sesB* RNAi parental flies and their GAL4 > UAS progeny. Data are shown as mean  
 4 ng mRNA  $\pm$  SEM ( $N = 3$ ), where  $**P < 0.01$ . The *SesB*<sup>1</sup> mutant does not show a reduction at the  
 5 mRNA level as assessed by Q-PCR, but is characterized by a decrease in *sesB* activity (reduced rate of  
 6 ATP synthesis).

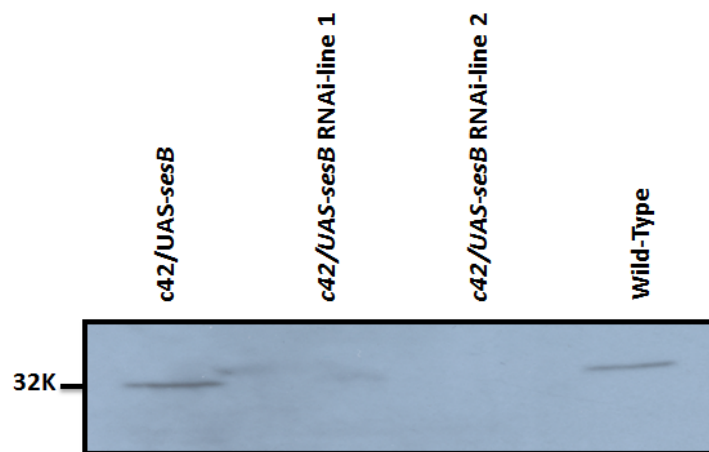

7

8

9 **Supplementary Fig. 2.** Western blot analysis of *sesB* over-expression and RNAi construct in  
 10 transgenic flies. Immunoblot of tubule from flies (c42 > UAS-*sesB*, c42 > UAS-*sesB* RNAi and Wild-  
 11 Type) using affinity purified *sesB* antibody identified a band of the predicted size of 32 kDa, which  
 12 confirms the specificity of the antibody. Validation of two independent *sesB* RNAi lines was  
 13 confirmed by the absence of the detection of the *sesB* protein.

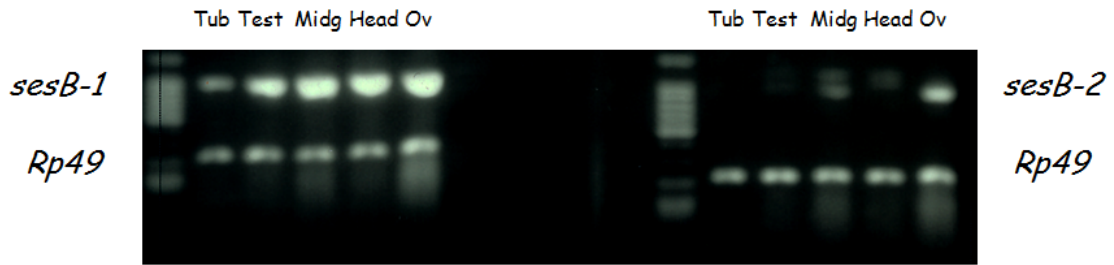

14

15

16 **Supplementary Fig. 3.** RT-PCR analysis of *sesB-1* and *sesB-2* transcripts expression in various tissues  
 17 of the fly. *sesB-1* is ubiquitously expressed in the fly, while *sesB-2* expression is absent in tubules  
 18 and seems to be specific to ovaries. RT-PCR using specific ANT primers reveals the absence of ANT  
 19 gene in tubule with an important expression in testis.

20
